# Supplementary material for: Synthesis of disulfides and diselenides by copper-catalyzed coupling reactions in water
Source: Royal Society of Chemistry journal article supplement (doi:10.1039/c3ob40464a), 2013-01-01

**Supplementary Material (ESI) for Organic & Biomolecular Chemistry**  
**This journal is (c) The Royal Society of Chemistry 2011**

# **Synthesis of disulfides and diselenides by copper-catalyzed coupling reactions in water**

**Zhengkai Li,<sup>a</sup> Fang Ke,<sup>a\*</sup> Hang Deng,<sup>a</sup> Hualong Xu,<sup>a</sup> Haifeng Xiang,<sup>a</sup> and Xiangge Zhou<sup>a,b\*</sup>**

[a] Institute of Homogeneous Catalysis, College of Chemistry, Sichuan University, Chengdu 610041, China

[b] Key Laboratory of Organic Synthesis of Jiangsu Province, College of Chemistry, Chemical Engineering and Materials Science, Soochow University, Suzhou 215123, China

E-mail: [zhouxiangge@scu.edu.cn](mailto:zhouxiangge@scu.edu.cn)

[Fax: +86-28-85412026](tel:+86-28-85412026)

## **Supplementary Information**

### **Table of Contents**

|                                                                                 |           |
|---------------------------------------------------------------------------------|-----------|
| <b>1. General information</b>                                                   | <b>S2</b> |
| <b>2. General procedure for the catalytic reactions</b>                         | <b>S2</b> |
| <b>3. Experimental procedures and characterization data</b>                     | <b>S3</b> |
| <b>4. References</b>                                                            | <b>S8</b> |
| <b>5. MS, <sup>1</sup>H NMR and <sup>13</sup>C NMR spectra for the products</b> | <b>S9</b> |

Supplementary Material (ESI) for Organic & Biomolecular Chemistry  
This journal is (c) The Royal Society of Chemistry 2011

## 1. General information

All reagents were purchased from commercial suppliers and used without further purification. Analytical thin layer chromatography (TLC) was performed using Merck silica gel GF254 plates. Column chromatography was performed using silica gel (200-300mesh) eluting with ethyl acetate and petroleum ether or with chloroform and methanol. All products were characterized by their NMR.  $^1\text{H}$  NMR spectra were recorded at 400 MHz and  $^{13}\text{C}$  NMR spectra were recorded at 100 MHz (Bruker DPX) with  $\text{CDCl}_3$  or  $\text{DMSO}-d_6$  as solvent. Chemical shifts are reported in ppm using TMS as internal standard. Gas chromatography - mass spectra (GC/MS) were recorded on an Agilent Technologies 6890 N instrument with an Agilent 5973N mass detector (EI) and a HP5-MS 30 m x 0.25 mm capillary apolar column (Stationary phase: 5% diphenyldimethylpolysiloxane film, 0.25  $\mu\text{m}$ ). GC/MS method: Initial temperature: 100  $^\circ\text{C}$ ; Initial time: 1 min; Ramp: about 15 $^\circ\text{C}/\text{min}$  until 250  $^\circ\text{C}$  then 20 min.

## 2. General procedure for the catalytic reactions

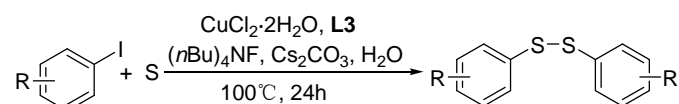

$\text{CuCl}_2$  (0.1 mmol), 1,10-phenanthroline (0.1 mmol), aryl halide (1.0 mmol), Sulfur (3.0 mmol),  $\text{Cs}_2\text{CO}_3$  (1.0 mmol),  $(n\text{Bu})_4\text{NF}$  (0.1 mmol), and water (2 mL) were added to a sealed tube. The reaction mixture was stirred at 100 $^\circ\text{C}$  for 24 h and then cooled to room temperature. After the solvent ( $\text{H}_2\text{O}$ ) being removed under reduced pressure, the residue was purified by silica-gel column chromatography to afford the corresponding product.

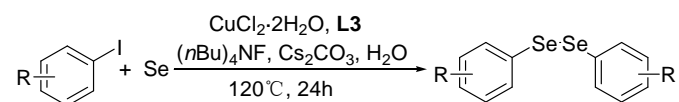

$\text{CuCl}_2$  (0.1 mmol), 1,10-phenanthroline (0.1 mmol), aryl halide (1.0 mmol), Selenium (3.0 mmol),  $\text{Cs}_2\text{CO}_3$  (1.0 mmol),  $(n\text{Bu})_4\text{NF}$  (0.1 mmol), and water (2 mL) were added to a sealed tube. The reaction mixture was stirred at 120 $^\circ\text{C}$  for 24h and then cooled to room temperature. After the solvent ( $\text{H}_2\text{O}$ ) being removed under reduced pressure, the residue was purified by silica-gel column chromatography to afford the corresponding product.

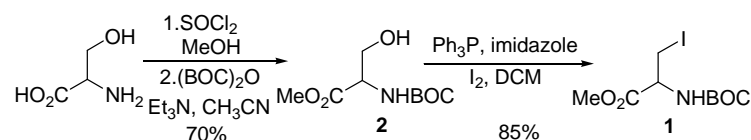

To a suspension of serine (25g, 0.24 mol) in MeOH (240 mL) at 0 $^\circ\text{C}$  was added thionyl chloride (17.3 mL, 0.24 mol) slowly, the suspension starts to dissolve during the addition, and when addition is complete, the mixture is brought to r.t. and stirred 1 hr. The stirring is then stopped, and the mixture was let stand overnight. The MeOH was then removed in vacuo, and the resulting solid was filtered, and washed with ether. The solid was then recrystallized from MeOH/ether to yield 25.4 g (70%) of a white crystallize solid.

To a solution of Boc-anhydride (14 g, 64 mmol) in acetonitrile (200 mL) was added Lserine methyl

**Supplementary Material (ESI) for Organic & Biomolecular Chemistry**  
**This journal is (c) The Royal Society of Chemistry 2011**

ester hydrochloride salt (9.98 g, 64 mmol) and triethylamine (26.8 mL, 190 mmol) in one portion. The reaction was stirred for 6 hrs, DCM (1 L) was added, and extracted with 1 N HCl (700 mL), sat. sodium bicarbonate (100 mL). The organic layer was dried (MgSO<sub>4</sub>), and the solvent was removed in vacuo, and placed under high vacuum overnight to remove the remainder of the solvent to yield Boc-serine-methylester (14 g, 99%) as a thick oil.

To a solution of triphenylphosphine (20.9 g, 79.8 mmol) and imidazole (5.4 g, 79.8 mmol) in DCM (300 mL) at 0°C was added I<sub>2</sub> (20.2 g, 79.8 mmol) in three portions. The solution was warmed to r.t. and stirred for 10 min, and re-cooled to 0°C. **2** (14 g, 64 mmol) was then added in DCM (75 mL, washed with 10 mL) dropwise. The solution was stirred at this temperature for 1 hr and r.t. for 1.5 hr. The reaction mixture was then filtered through silica gel using 50/50 ether/pet. ether as eluent. The solvent was then removed in vacuo. Ether was then added to crash out the phosphine oxide, and the mixture was filtered through celite with ether as the eluent. The solvent was again removed in vacuo, and the residue was purified on silica (10-15% ether/PE) to yield **1** (17.5 g, 84%) as an oil which solidified in the freezer.

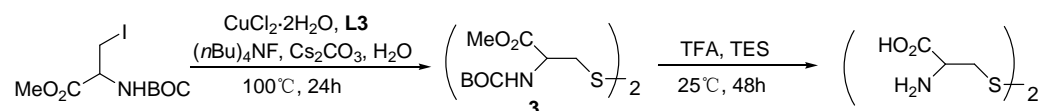

CuCl<sub>2</sub>·2H<sub>2</sub>O (0.1 mmol), 1,10-phenanthroline (0.1 mmol), **1** (1.0 mmol), Sulfur (3.0 mmol), Cs<sub>2</sub>CO<sub>3</sub> (1.0 mmol), (nBu)<sub>4</sub>NF (0.1 mmol), and water (2 mL) were added to a sealed tube. The reaction mixture was stirred at 100°C for 24h and then cooled to room temperature. After the solvent (H<sub>2</sub>O) being removed under reduced pressure, the residue was purified by silica-gel column chromatography to afford the corresponding product.

To a solution of **3** (1 mmol) in DMF (30 mL) was added p-chloroaniline (1.2 mmol), 1-ethyl-3-(3-dimethylaminopropyl) carbodiimide (EDC, 1 mmol), HOBt (1.2 mmol), and DIPEA (2.4 mmol). The reaction mixture was stirred at RT for 2 h. After reaction was complete, 30 mL of 1M HCl was added, and the mixture was extracted with EtOAc. The combined organic layers were washed with brine, dried over MgSO<sub>4</sub>, and filtered. EtOAc was removed under vacuum, yielding cystine, which was further purified by column chromatography (SiO<sub>2</sub>/3:7 ethyl acetate/hexane) to give a white solid.

### 3. Experimental procedures and characterization data

#### 1,2-diphenyldisulfane<sup>1</sup>

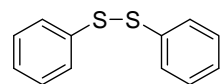

Purification by flash chromatography (petroleum ether/ethyl acetate 30:1). Yellow oil.

<sup>1</sup>H NMR (400 MHz, CDCl<sub>3</sub>) δ = 7.25-7.55 (m, 10H).

<sup>13</sup>C NMR (100 MHz, CDCl<sub>3</sub>) δ = 155.2, 129.7, 120.9, 115.4.

MS (EI, m/z): 218 [M<sup>+</sup>].

#### 1,2-di-*p*-tolyl disulfane<sup>1</sup>

Supplementary Material (ESI) for Organic & Biomolecular Chemistry  
This journal is (c) The Royal Society of Chemistry 2011

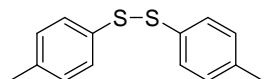

Purification by flash chromatography (petroleum ether/ethyl acetate 30:1). Yellow oil.

**<sup>1</sup>H NMR (400 MHz, CDCl<sub>3</sub>)** δ = 6.99 (d, 4H, *J*=8Hz), 6.72(d, 4H, *J*=8Hz), 2.24(s, 6H).

**<sup>13</sup>C NMR (100 MHz, CDCl<sub>3</sub>)** δ = 152.8, 130.2, 130.1, 115.3, 20.5.

**MS (EI, m/z):** 246 [M<sup>+</sup>].

**1,2-bis(4-chlorophenyl)disulfane<sup>1</sup>**

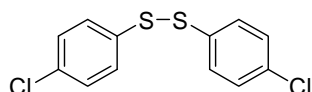

Purification by flash chromatography (petroleum ether/ethyl acetate 30:1). Yellow oil.

**<sup>1</sup>H NMR (400 MHz, CDCl<sub>3</sub>)** δ = 8.01(d, 4H, *J*=3.2Hz), 7.65(d, 4H, *J*=2.8Hz).

**<sup>13</sup>C NMR (100 MHz, CDCl<sub>3</sub>)** δ = 145.0, 129.1, 123.2, 116.3.

**MS (EI, m/z):** 287 [M<sup>+</sup>].

**1,2-bis(4-nitrophenyl)disulfane<sup>1</sup>**

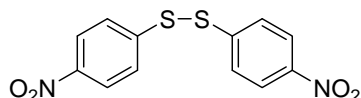

Purification by flash chromatography (petroleum ether/ethyl acetate 30:1). Yellow oil.

**<sup>1</sup>H NMR (400 MHz, DMSO-*d*<sub>6</sub>)** δ = 7.65 (d, 4H, *J*=8Hz), 6.92 (d, 4H, *J*=8Hz).

**<sup>13</sup>C NMR (100 MHz, CDCl<sub>3</sub>)** δ = 152.5, 139.1, 126.4, 113.4.

**MS (EI, m/z):** 308 [M<sup>+</sup>].

**1,2-bis(4-fluorophenyl)disulfane<sup>2</sup>**

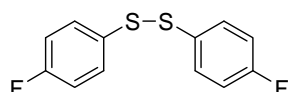

Purification by flash chromatography (petroleum ether/ethyl acetate 30:1). Yellow oil.

**<sup>1</sup>H NMR (400 MHz, CDCl<sub>3</sub>)** δ = 6.88-6.82(m, 4H), 6.64-6.60(m, 4H).

**<sup>13</sup>C NMR (100 MHz, CDCl<sub>3</sub>)** δ = 157.6, 155.3, 142.4, 116.1, 116.0, 115.8, 115.6.

**MS (EI, m/z):** 254 [M<sup>+</sup>].

**1,2-bis(4-acetylphenyl)disulfane<sup>3</sup>**

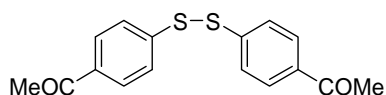

Purification by flash chromatography (petroleum ether/ethyl acetate 30:1). Yellow oil.

**<sup>1</sup>H NMR (400 MHz, CDCl<sub>3</sub>)** δ = 7.91(d, 4H, *J*=8.4Hz), 7.55(d, 4H, *J*=8.0Hz), 2.56(s, 6H).

**<sup>13</sup>C NMR (100 MHz, CDCl<sub>3</sub>)** δ = 196.9, 142.3, 135.8, 129.1, 126.1, 26.6.

**MS (EI, m/z):** 302 [M<sup>+</sup>].

**1,2-bis(4-methoxyphenyl)disulfane<sup>1</sup>**

Supplementary Material (ESI) for Organic & Biomolecular Chemistry  
 This journal is (c) The Royal Society of Chemistry 2011

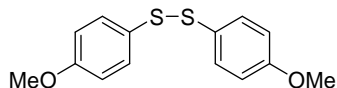

Purification by flash chromatography (petroleum ether/ethyl acetate 30:1). Yellow oil.

**<sup>1</sup>H NMR (400 MHz, CDCl<sub>3</sub>)** δ = 7.59(d, 4H, *J*=8.8Hz), 6.71(d, 4H, *J*=9.2Hz), 3.80 (s, 6H).

**<sup>13</sup>C NMR (100 MHz, CDCl<sub>3</sub>)** δ = 159.5, 138.2, 116.4, 82.8, 55.37.

**MS (EI, m/z):** 278 [M<sup>+</sup>].

**1,2-bis(3-methoxyphenyl)disulfane<sup>2</sup>**

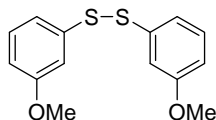

**<sup>1</sup>H NMR (400 MHz, CDCl<sub>3</sub>)** δ = 7.55-6.82(m, 8H), 3.83 (s, 6H)..

**<sup>13</sup>C NMR (100 MHz, CDCl<sub>3</sub>)** δ = 160.4, 134.2, 133.8, 132.7, 127.4, 114.7, 55.4.

**MS (EI, m/z):** 278 [M<sup>+</sup>].

**1,2-bis(2-nitrophenyl)disulfane<sup>4</sup>**

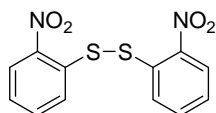

Purification by flash chromatography (petroleum ether/ethyl acetate 30:1). Yellow oil.

**<sup>1</sup>H NMR (400 MHz, CDCl<sub>3</sub>)** δ = 8.39(d, 2H, *J*=8.0Hz), 7.76-7.87 (m, 4H), 7.58 (d, *J*=7.6Hz, 2H).

**<sup>13</sup>C NMR (100 MHz, CDCl<sub>3</sub>)** δ = 146.0, 135.9, 133.8, 128.3, 127.4, 127.1.

**MS (EI, m/z):** 308 [M<sup>+</sup>].

**1,2-dio-tolydisulfane<sup>2</sup>**

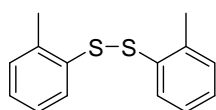

Purification by flash chromatography (petroleum ether/ethyl acetate 30:1). Yellow oil.

**<sup>1</sup>H NMR (400 MHz, CDCl<sub>3</sub>)** δ = 7.26-7.08 (m, 8H), 2.41 (s, 6H).

**<sup>13</sup>C NMR (100 MHz, CDCl<sub>3</sub>)** δ = 135.3, 132.2, 129.1, 128.4, 123.1, 120.6, 46.7.

**MS (EI, m/z):** 246 [M<sup>+</sup>].

**3-(2-(pyridine-3-yl)disulfanyl)pyridine<sup>5</sup>**

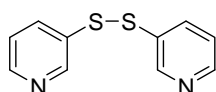

Purification by flash chromatography (petroleum ether/ethyl acetate 30:1). Yellow oil.

**<sup>1</sup>H NMR (400 MHz, CDCl<sub>3</sub>)** δ = 8.71-8.56(m, 4H), 7.73-7.71(m, 2H), 7.20 (s, 2H).

**<sup>13</sup>C NMR (100 MHz, CDCl<sub>3</sub>)** δ = 153.0, 148.7, 140.6, 127.8, 124.8.

**MS (EI, m/z):** 220 [M<sup>+</sup>].

**1,2-di(naphthalen-1-yl)disulfane<sup>4</sup>**

Supplementary Material (ESI) for Organic & Biomolecular Chemistry  
This journal is (c) The Royal Society of Chemistry 2011

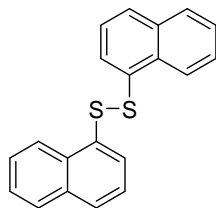

Purification by flash chromatography (petroleum ether/ethyl acetate 30:1). Yellow solid.

**<sup>1</sup>H NMR (400 MHz, CDCl<sub>3</sub>)** δ = 8.36(d, 2H, *J*=8.4Hz), 7.86-7.91(m, 6H), 7.36-7.68(m, 6H).

**<sup>13</sup>C NMR (100 MHz, CDCl<sub>3</sub>)** δ = 134.7, 132.1, 130.0, 128.4, 128.1, 127.5, 127.2, 126.8, 126.3, 123.0.

**MS (EI, m/z):** 318 [M<sup>+</sup>].

**1,2-diphenyldiselane<sup>6</sup>**

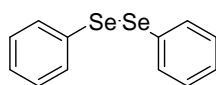

Purification by flash chromatography (petroleum ether/ethyl acetate 30:1). Yellow solid.

**<sup>1</sup>H NMR (400 MHz, CDCl<sub>3</sub>)** δ = 7.35-7.75(m, 10H).

**<sup>13</sup>C NMR (100 MHz, CDCl<sub>3</sub>)** δ = 133.1, 131.7, 129.4, 127.9.

**MS (EI, m/z):** 312 [M<sup>+</sup>].

**1,2 dip-tolyldiselane<sup>6</sup>**

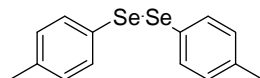

Purification by flash chromatography (petroleum ether/ethyl acetate 30:1). Yellow oil.

**<sup>1</sup>H NMR (400 MHz, CDCl<sub>3</sub>)** δ = 7.53(d, 4H, *J*=7.6Hz), 7.11(d, 4H, *J*=7.6Hz), 2.37(s, 6H).

**<sup>13</sup>C NMR (100 MHz, CDCl<sub>3</sub>)** δ = 138.0, 133.4, 132.3, 129.4, 21.1.

**MS (EI, m/z):** 340 [M<sup>+</sup>].

**1,2-bis(4-chlorophenyl)diselane<sup>6</sup>**

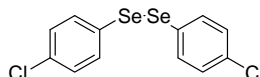

Purification by flash chromatography (petroleum ether/ethyl acetate 30:1). Yellow oil.

**<sup>1</sup>H NMR (400 MHz, CDCl<sub>3</sub>)** δ = 7.18 (d, 4H, *J*=8Hz), 6.76(d, 4H, *J*=8Hz).

**<sup>13</sup>C NMR (100 MHz, CDCl<sub>3</sub>)** δ = 153.7, 129.6, 125.8, 116.7.

**MS (EI, m/z):** 381 [M<sup>+</sup>].

**1,2-bis(4-nitrophenyl)diselane<sup>7</sup>**

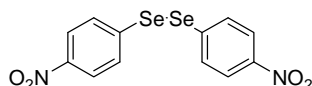

Purification by flash chromatography (petroleum ether/ethyl acetate 30:1). Yellow oil.

**<sup>1</sup>H NMR (400 MHz, CDCl<sub>3</sub>)** δ = 7.33 (d, 4H, *J*=8Hz), 6.72(d, 4H, *J*=8Hz).

**<sup>13</sup>C NMR (100 MHz, CDCl<sub>3</sub>)** δ = 154.2, 132.5, 117.2, 113.1.

**MS (EI, m/z):** 402 [M<sup>+</sup>].

Supplementary Material (ESI) for Organic & Biomolecular Chemistry  
This journal is (c) The Royal Society of Chemistry 2011

**1,2-bis(4-fluorophenyl)diselane<sup>8</sup>**

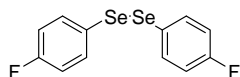

Purification by flash chromatography (petroleum ether/ethyl acetate 30:1). Yellow oil.

<sup>1</sup>H NMR (400 MHz, CDCl<sub>3</sub>) δ = 6.90-6.94 (m, 4H), 6.75-6.79 (m, 4H).

<sup>13</sup>C NMR (100 MHz, CDCl<sub>3</sub>) δ = 158.6, 156.2, 150.9, 116.4, 116.3, 116.2, 116.0.

MS (EI, m/z): 348 [M<sup>+</sup>].

**1,2-bis(4-acetylphenyl)diselane<sup>9</sup>**

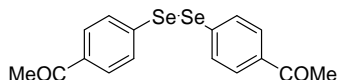

Purification by flash chromatography (petroleum ether/ethyl acetate 30:1). Yellow oil.

<sup>1</sup>H NMR (400 MHz, CDCl<sub>3</sub>) δ = 7.79 (d, 4H, J=8Hz), 7.55 (d, 4H, J=8Hz), 2.61 (s, 6H).

<sup>13</sup>C NMR (100 MHz, CDCl<sub>3</sub>) δ = 197.3, 136.2, 132.7, 130.2, 129.2, 29.7.

MS (EI, m/z): 396 [M<sup>+</sup>].

**1,2-bis(4-methoxyphenyl)diselane<sup>6</sup>**

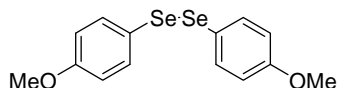

Purification by flash chromatography (petroleum ether/ethyl acetate 30:1). Yellow oil.

<sup>1</sup>H NMR (400 MHz, CDCl<sub>3</sub>) δ = 7.54 (d, 4H, J=8.4Hz), 6.84 (d, 4H, J=8.4Hz), 3.83 (s, 6H).

<sup>13</sup>C NMR (100 MHz, CDCl<sub>3</sub>) δ = 160.1, 135.5, 122.0, 114.8, 55.3.

MS (EI, m/z): 372 [M<sup>+</sup>].

**1,2-bis(3-methoxyphenyl)diselane<sup>6</sup>**

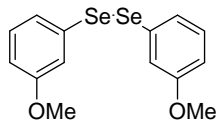

Purification by flash chromatography (petroleum ether/ethyl acetate 30:1). Yellow oil.

<sup>1</sup>H NMR (400 MHz, CDCl<sub>3</sub>) δ = 7.13-7.19 (m, 6H), 6.89 (d, 2H, J=8Hz), 3.82 (s, 6H).

<sup>13</sup>C NMR (100 MHz, CDCl<sub>3</sub>) δ = 160.4, 130.6, 123.8, 122.9, 117.2, 113.1, 55.4.

MS (EI, m/z): 372 [M<sup>+</sup>].

**1,2-bis(2-methoxyphenyl)diselane<sup>6</sup>**

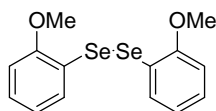

Purification by flash chromatography (petroleum ether/ethyl acetate 30:1). Yellow oil.

<sup>1</sup>H NMR (CDCl<sub>3</sub>, 400 MHz) δ = 7.57 (d, 2H, J=8Hz), 7.28-7.32 (m, 2H), 6.92 (d, 2H, J=8Hz), 6.86 (m, 2H), 3.91 (s, 6H). <sup>13</sup>C NMR (CDCl<sub>3</sub>, 100 MHz) δ = 155.8, 133.4, 128.6, 121.8, 112.0, 111.7, 56.2. MS (EI, m/z): 372 [M<sup>+</sup>].

<sup>1</sup>H NMR (400 MHz, CDCl<sub>3</sub>) δ = 7.57 (d, 2H, J=8Hz), 7.28-7.32 (m, 2H), 6.92 (d, 2H, J=8Hz), 6.86 (m, 2H), 3.91 (s, 6H).

Supplementary Material (ESI) for Organic & Biomolecular Chemistry  
This journal is (c) The Royal Society of Chemistry 2011

$^{13}\text{C}$  NMR (100 MHz,  $\text{CDCl}_3$ )  $\delta$  = 155.8, 133.4, 128.6, 121.8, 1120, 111.7, 56.2.

MS (EI, m/z): 372 [M<sup>+</sup>].

1,2-dio-tolydiselane<sup>6</sup>

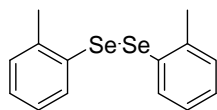

Purification by flash chromatography (petroleum ether/ethyl acetate 30:1). Yellow oil.

$^1\text{H}$  NMR (400 MHz,  $\text{CDCl}_3$ )  $\delta$  = 8.41-7.57(m, 8H), 3.35(s, 6H).

$^{13}\text{C}$  NMR (100 MHz,  $\text{CDCl}_3$ )  $\delta$  = 138.7, 133.2, 131.2, 131.1, 130.0, 128.6, 21.4.

MS (EI, m/z): 340 [M<sup>+</sup>].

3-(2-(pyridine-3-yl)diselanyl)pyridine<sup>6</sup>

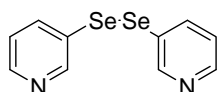

Purification by flash chromatography (petroleum ether/ethyl acetate 30:1). Yellow oil.

$^1\text{H}$  NMR (400 MHz,  $\text{CDCl}_3$ )  $\delta$  = 8.51-7.50(m, 10H).

$^{13}\text{C}$  NMR (100 MHz,  $\text{CDCl}_3$ )  $\delta$  = 152.5, 148.1, 140.2, 133.6, 129.6.

MS (EI, m/z): 314 [M<sup>+</sup>].

1,2-di(naphthalen-1-yl)diselane<sup>9</sup>

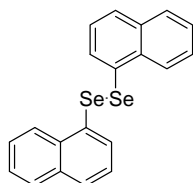

Purification by flash chromatography (petroleum ether/ethyl acetate 30:1). Yellow soild.

$^1\text{H}$  NMR (400 MHz,  $\text{CDCl}_3$ )  $\delta$  = 8.32-8.34(m, 2H), 7.84-7.90(m, 6H), 7.35-7.68(m, 6H).

$^{13}\text{C}$  NMR (100 MHz,  $\text{CDCl}_3$ )  $\delta$  = 134.7, 132.1, 130.0, 128.4, 128.0, 127.4, 127.2, 126.8, 126.3, 123.0.

MS (EI, m/z): 412 [M<sup>+</sup>].

#### 4. References

- 1 M. Oba, K. Tanaka, K. Nishiyama, and W. Ando, *J. Org. Chem.*, 2004, **69**, 915-920.
- 2 A. Alam, Y. Takaguchi, and Sadao Tsuboi, *Synth. Commun.*, 2005, **10**, 1329-1333.
- 3 F. Barba, F. Ranz, B. Batanero, *Tetrahedron Lett.*, 2009, **50**, 6798-6799.
- 4 G. W. Kabalka, M. S. Reddy, and M.-L. Yao, *Tetrahedron Lett.*, 2009, **50**, 7340-7342.
- 5 F. Shirini, M. A. Zolfigol, and M. Khalegi, *Mendeleev Commun.*, 2004, 34-35.
- 6 D. Singh, A. M. Deobald, L. R. S. Camargo, G. Tabarelli, O. E. D. Rodrigues, and A. L. Braga, *Org. Lett.*, 2010, **12**, 3288-3291.
- 7 L. Syper, and J. Mlochowshi, *Tetrahedron*, 1988, **44**, 6119-6130.
- 8 I. P. Beletskaya, A. S. Sigeev, A. S. Peregodov, and P. V. Petrovskii, *Tetrahedron Lett.*, 2003, **44**, 7039-7041.
- 9 T. Hyugano, S. Liu, A. Ouchi, *J. Org. Chem.* **2008**, 72, 8861-8866.



Supplementary Material (ESI) for Organic & Biomolecular Chemistry  
This journal is (c) The Royal Society of Chemistry 2011

5. Ms, <sup>1</sup>H NMR and <sup>13</sup>C NMR spectra for the products

1,2-diphenyldisulfane

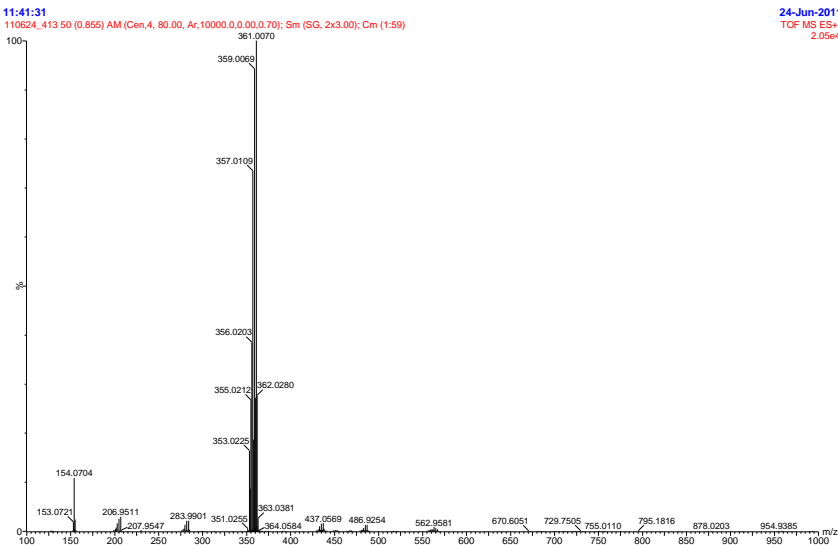

1,2-diphenyldisilane

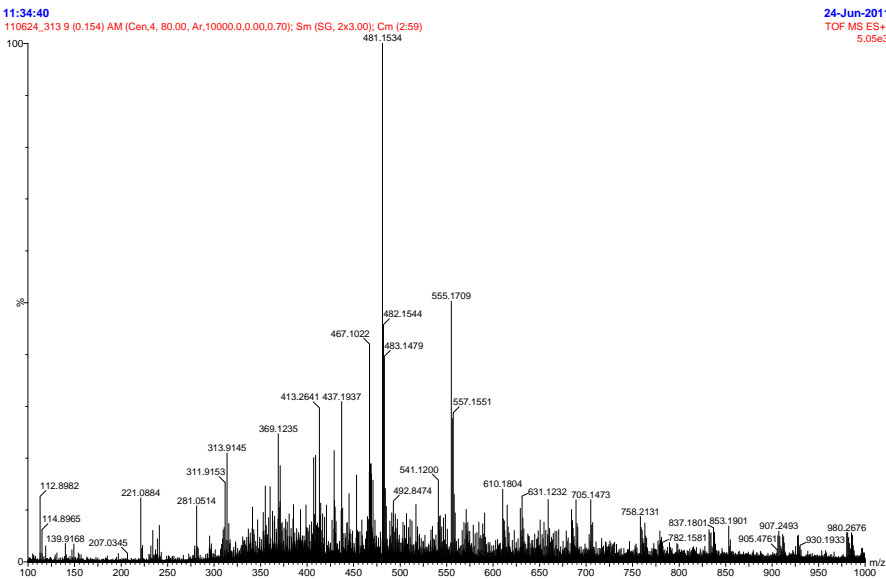

Supplementary Material (ESI) for Organic & Biomolecular Chemistry  
This journal is (c) The Royal Society of Chemistry 2011

1,2-diphenyldisulfane

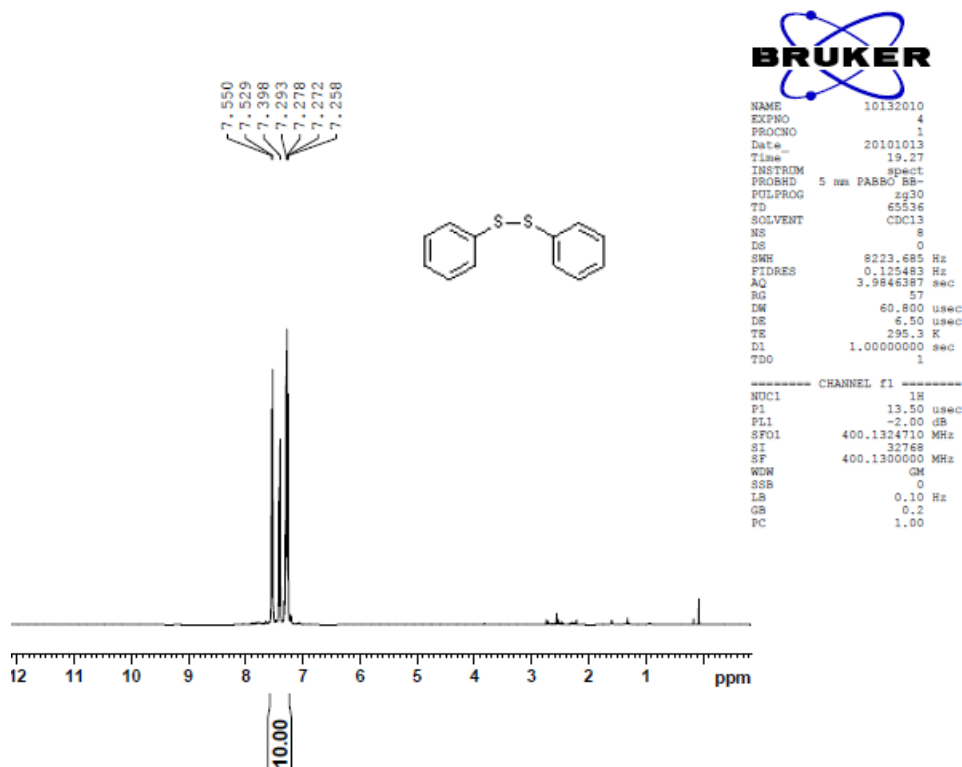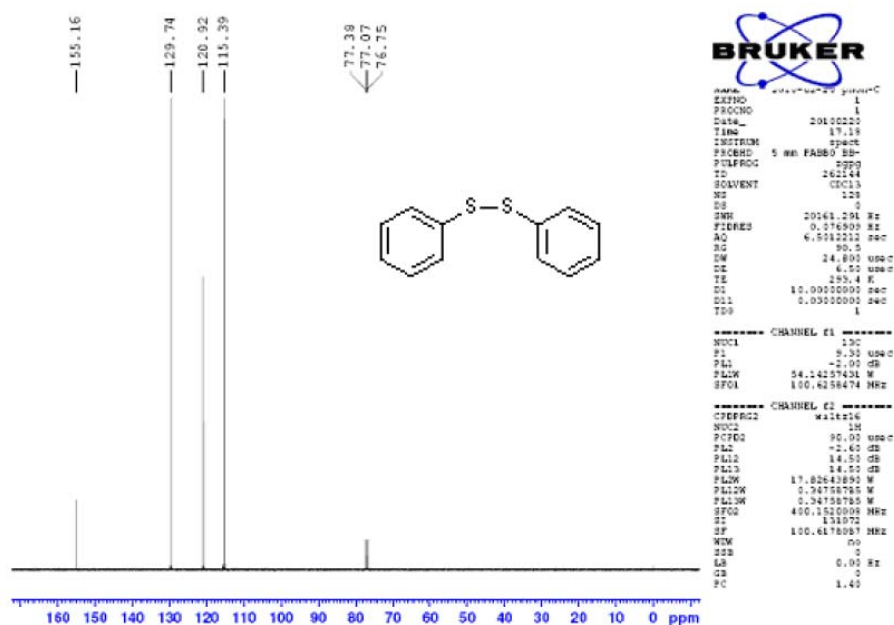

Supplementary Material (ESI) for Organic & Biomolecular Chemistry  
This journal is (c) The Royal Society of Chemistry 2011

1,2-di-*p*-tolylsulfane

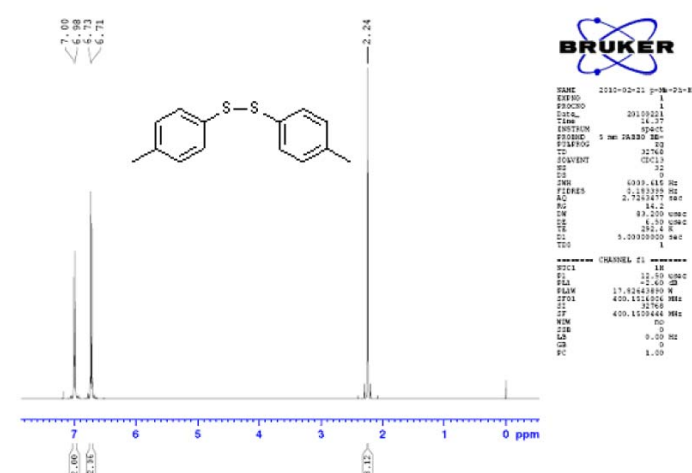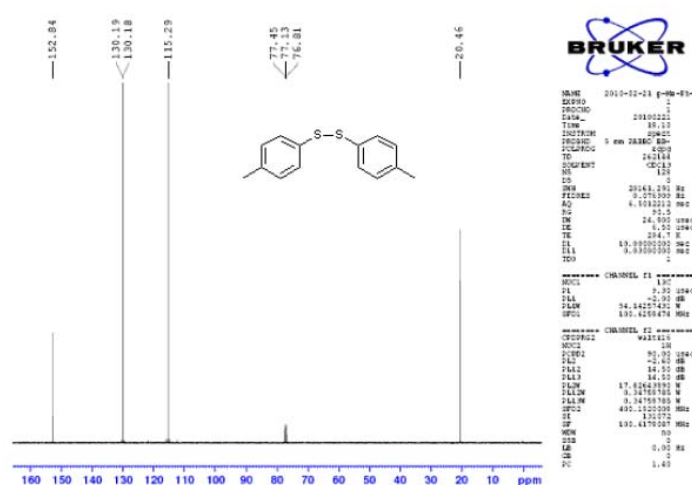

Supplementary Material (ESI) for Organic & Biomolecular Chemistry  
This journal is (c) The Royal Society of Chemistry 2011

1,2-bis(4-chlorophenyl)disulfane

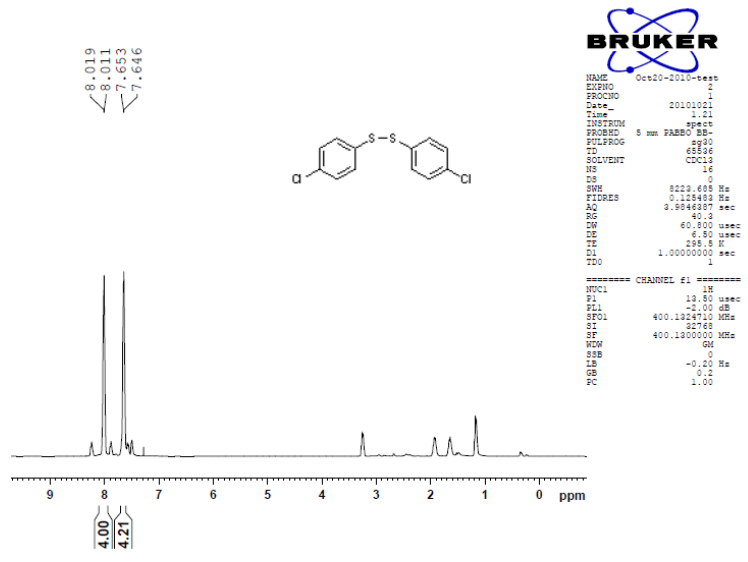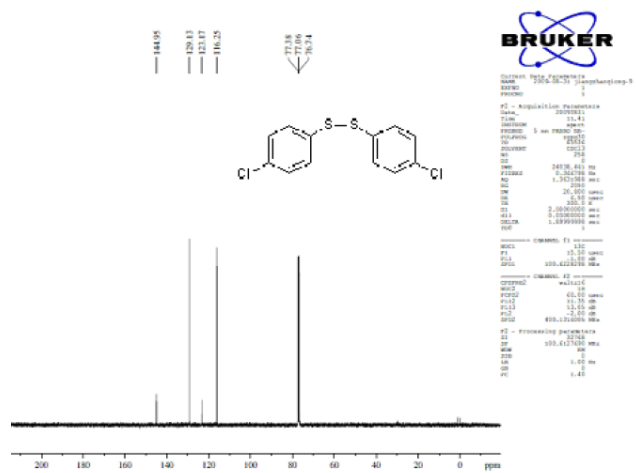

Supplementary Material (ESI) for Organic & Biomolecular Chemistry  
This journal is (c) The Royal Society of Chemistry 2011

1,2-bis(4-nitrophenyl)disulfane

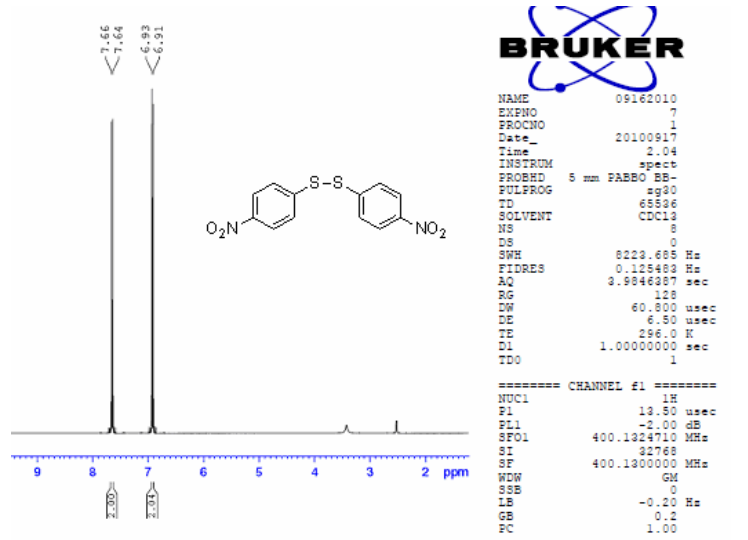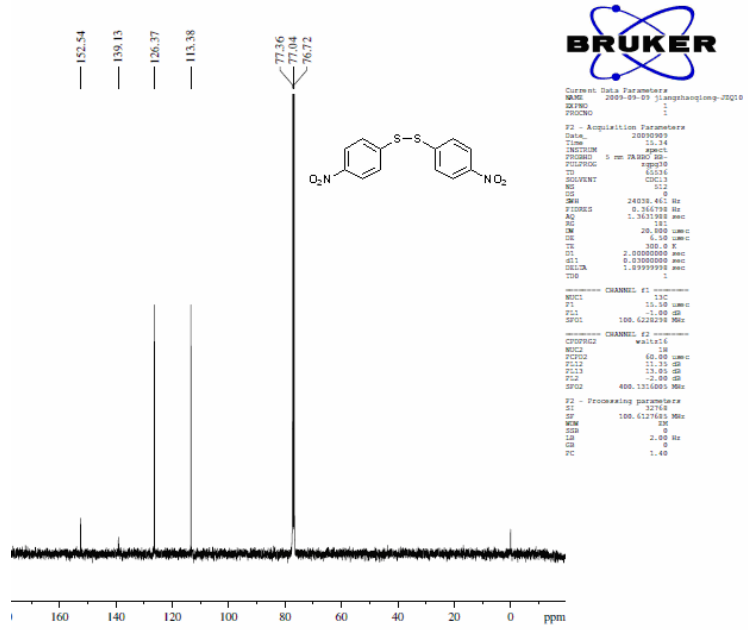

Supplementary Material (ESI) for Organic & Biomolecular Chemistry  
This journal is (c) The Royal Society of Chemistry 2011

1,2-bis(4-fluorophenyl)disulfane

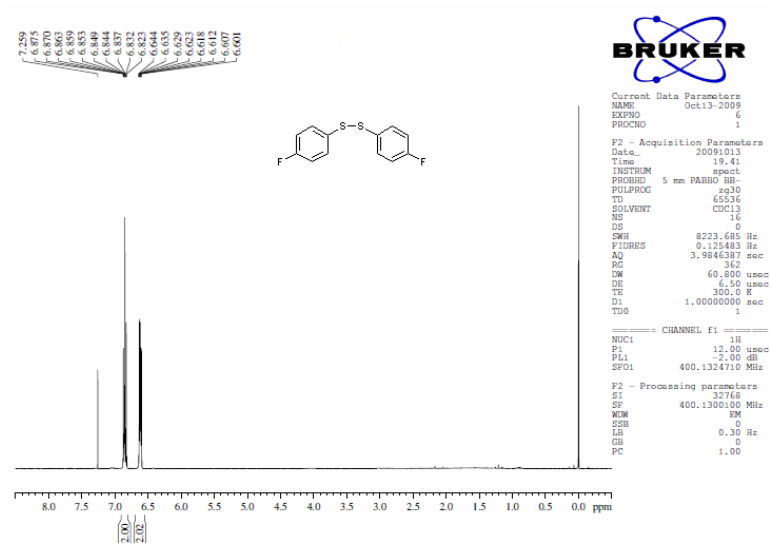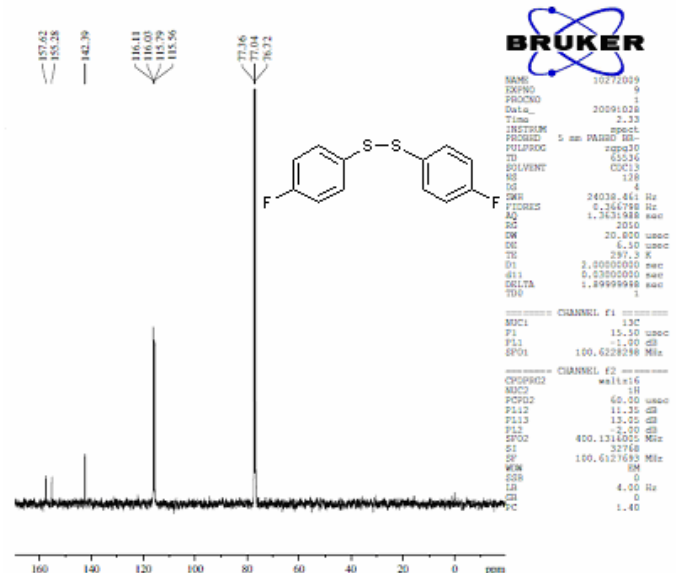

Supplementary Material (ESI) for Organic & Biomolecular Chemistry  
This journal is (c) The Royal Society of Chemistry 2011

1,2-bis(4-acetylphenyl)disulfane

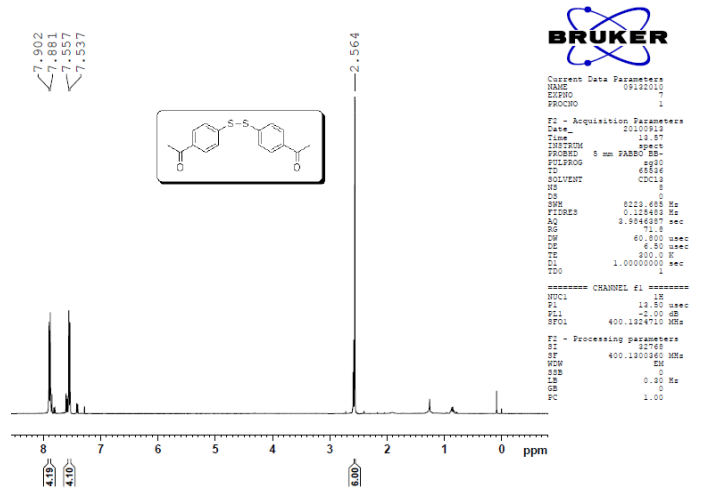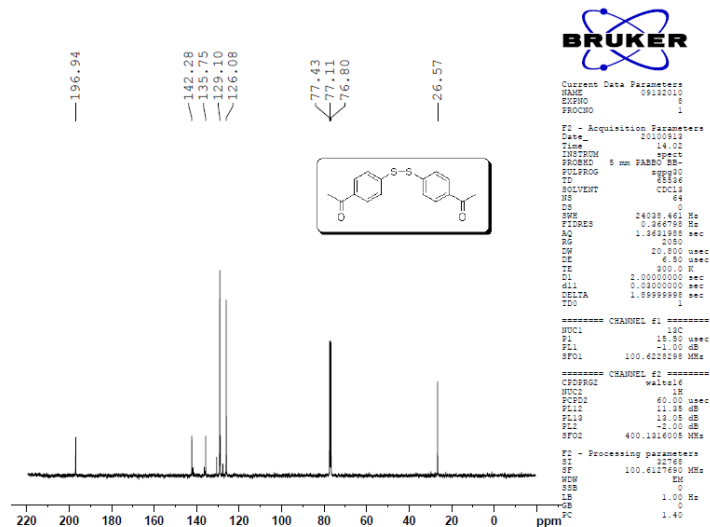

Supplementary Material (ESI) for Organic & Biomolecular Chemistry  
This journal is (c) The Royal Society of Chemistry 2011

1,2-bis(4-methoxyphenyl)disulfane

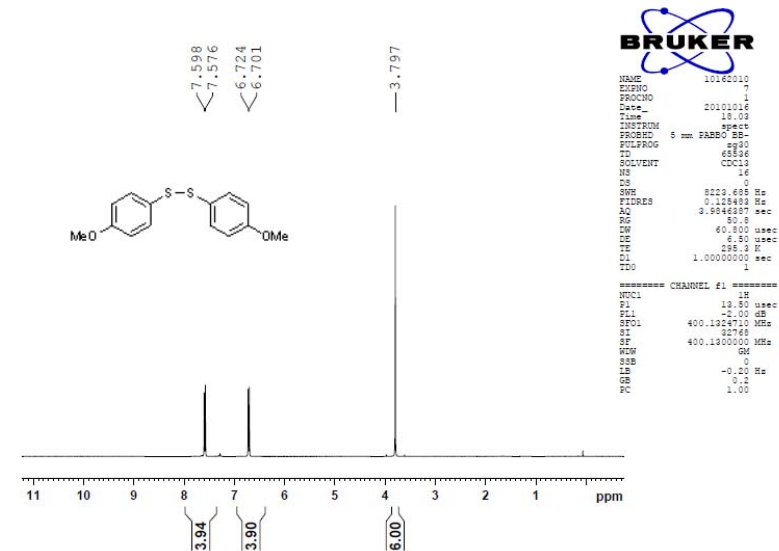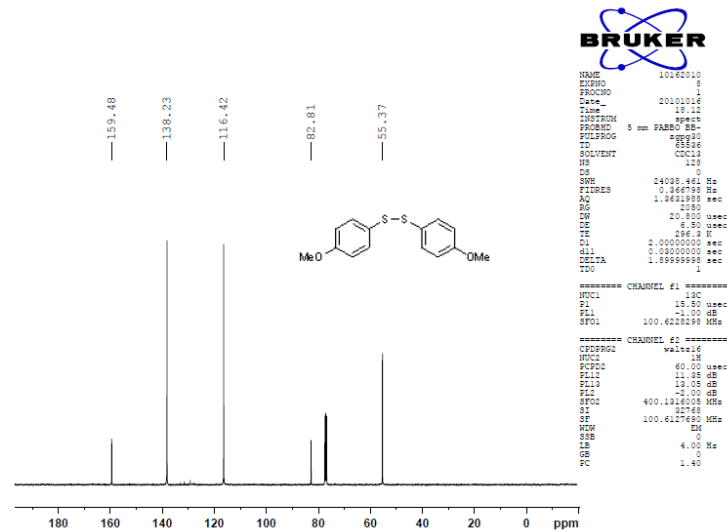



Supplementary Material (ESI) for Organic & Biomolecular Chemistry  
This journal is (c) The Royal Society of Chemistry 2011

1,2-bis(3-methoxyphenyl)disulfane

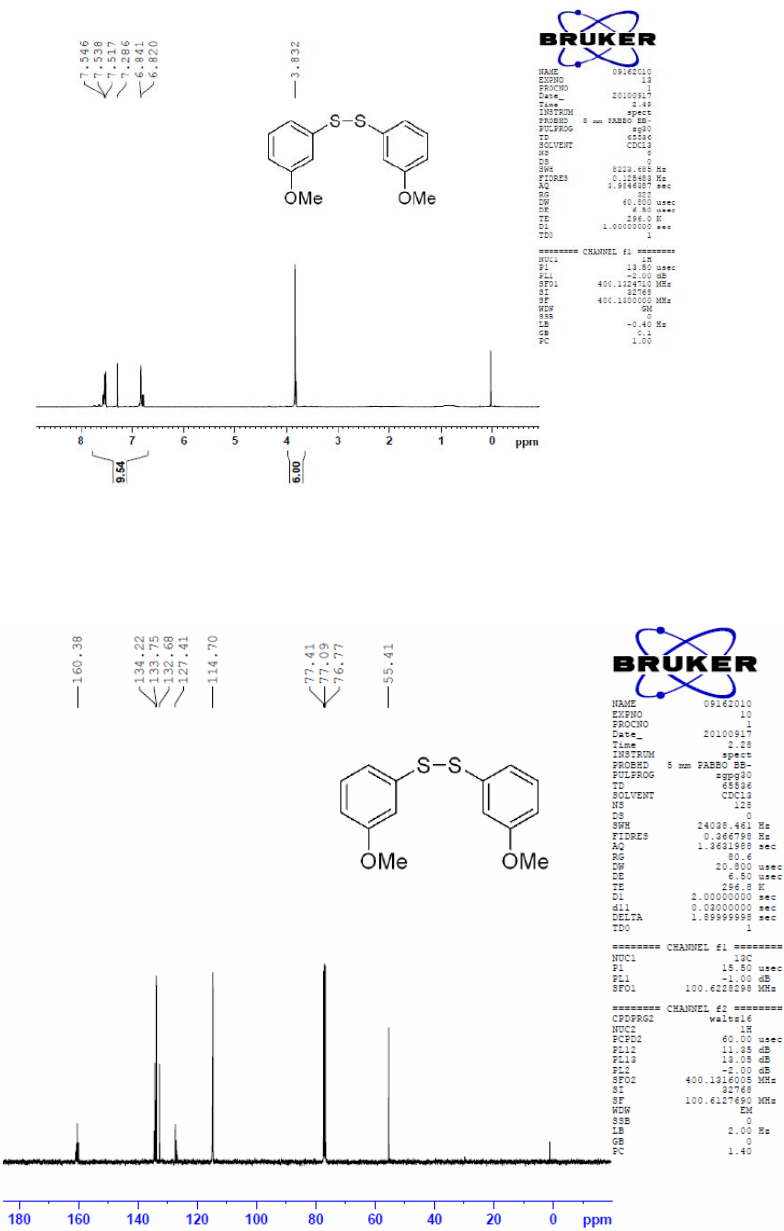

Supplementary Material (ESI) for Organic & Biomolecular Chemistry  
This journal is (c) The Royal Society of Chemistry 2011

1,2-bis(2-nitrophenyl)disulfane

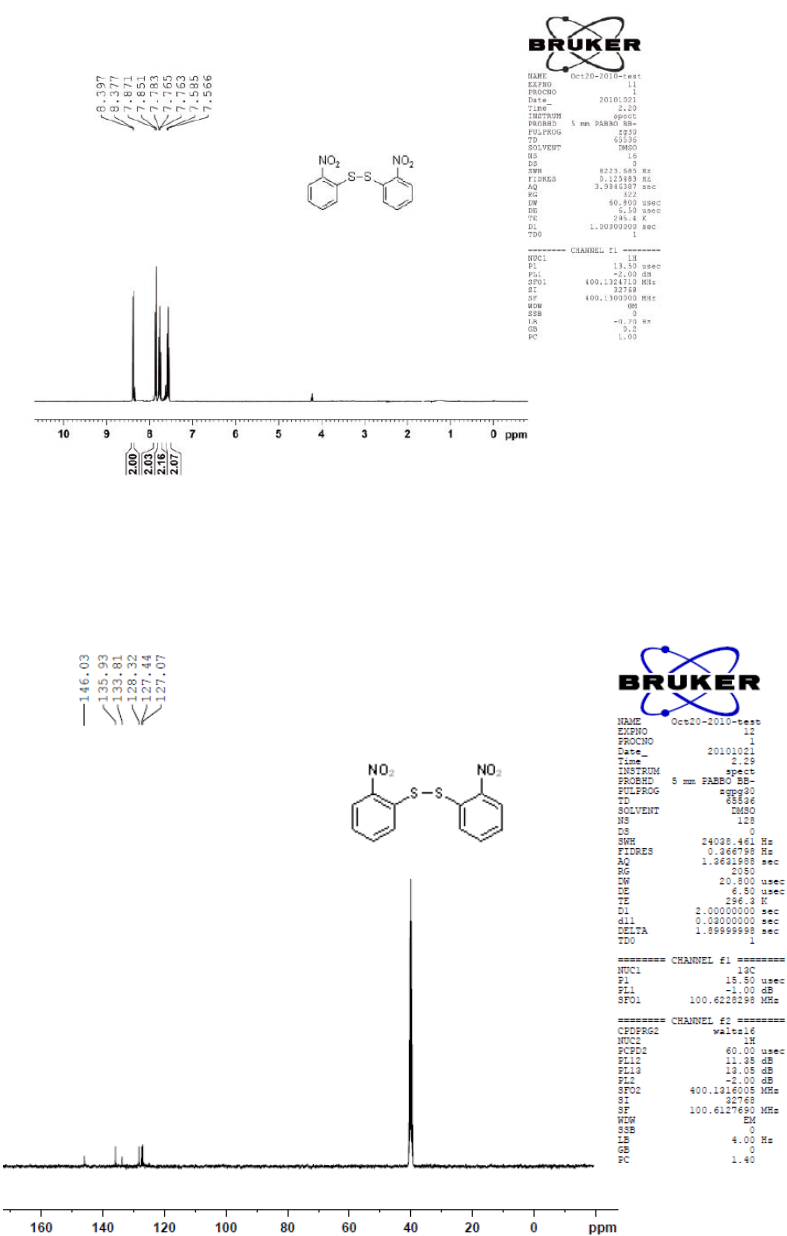

Supplementary Material (ESI) for Organic & Biomolecular Chemistry  
This journal is (c) The Royal Society of Chemistry 2011

1,2-di-*o*-tolylsulfane

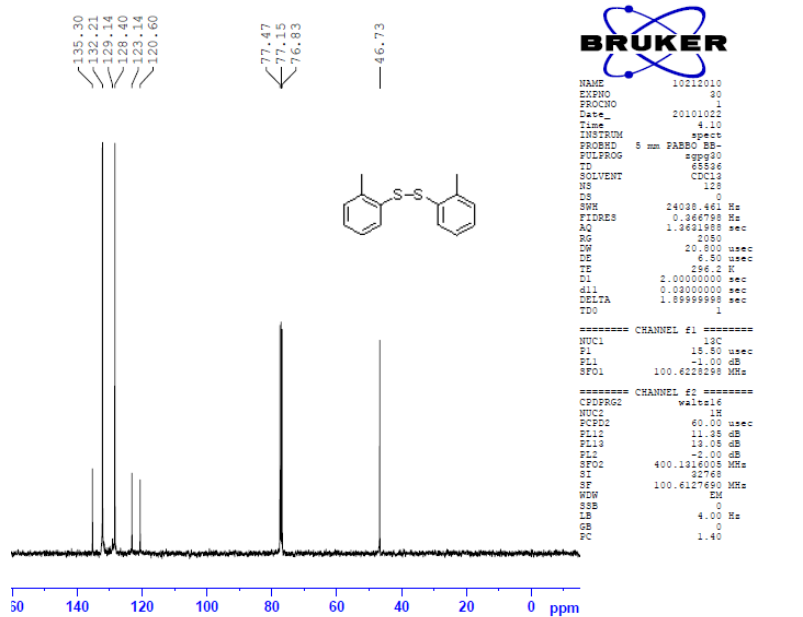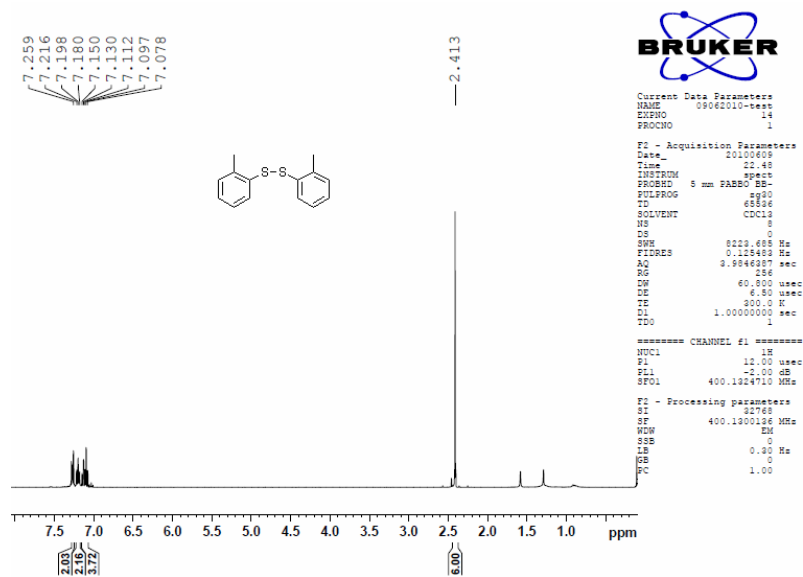

Supplementary Material (ESI) for Organic & Biomolecular Chemistry  
This journal is (c) The Royal Society of Chemistry 2011

3-(2-(pyridine-3-yl)disulfanyl)pyridine

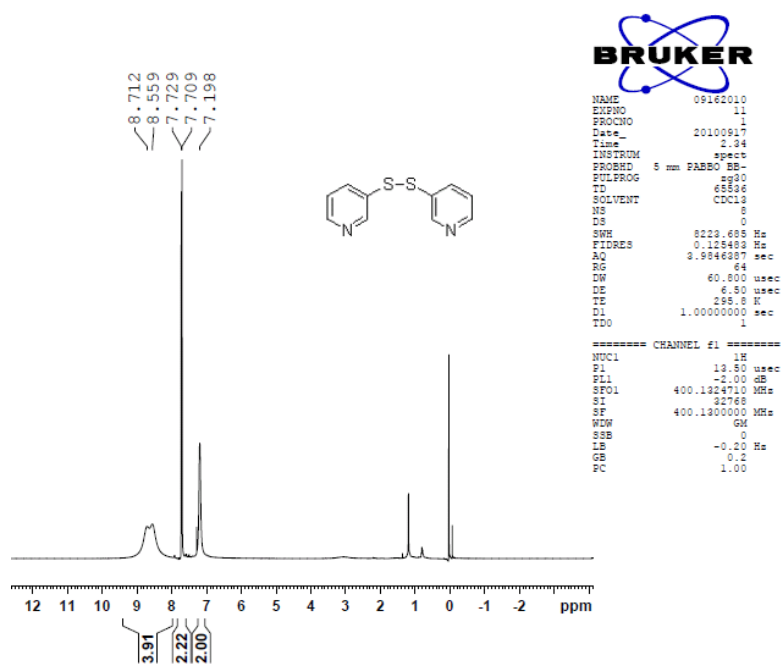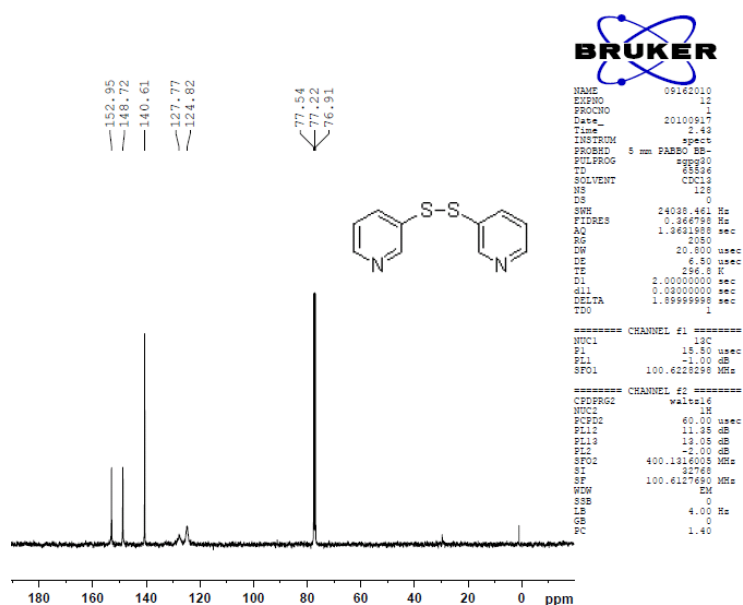

Supplementary Material (ESI) for Organic & Biomolecular Chemistry  
This journal is (c) The Royal Society of Chemistry 2011

1,2-di(naphthalen-1-yl)disulfane

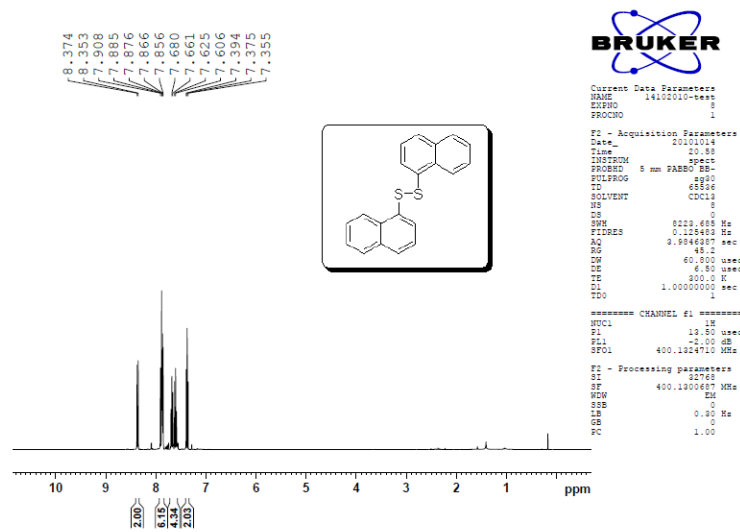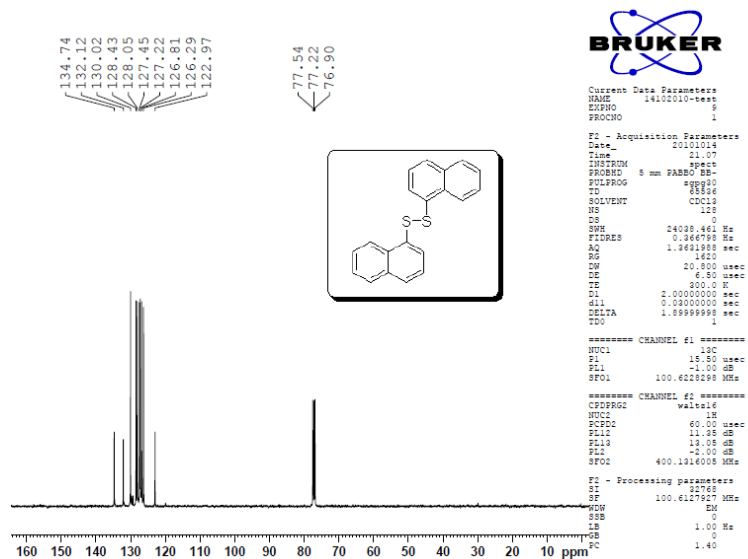

Supplementary Material (ESI) for Organic & Biomolecular Chemistry  
This journal is (c) The Royal Society of Chemistry 2011

1,2-diphenyldislane

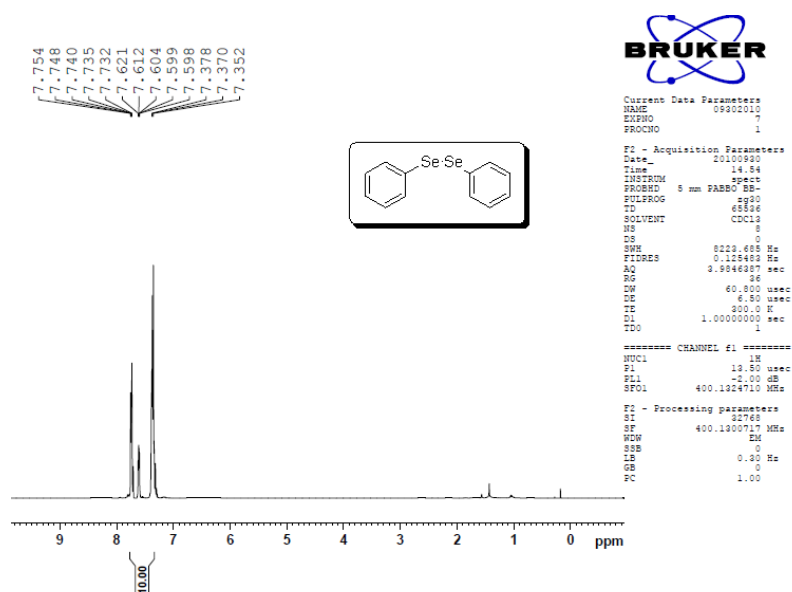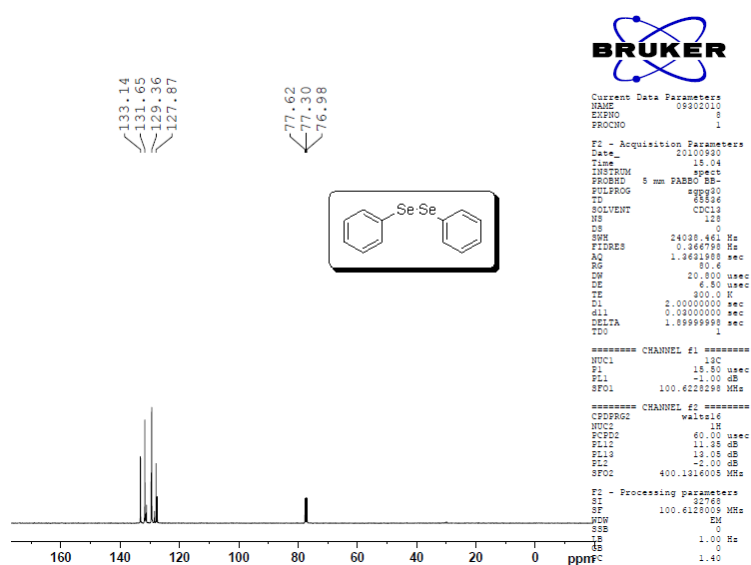

Supplementary Material (ESI) for Organic & Biomolecular Chemistry  
This journal is (c) The Royal Society of Chemistry 2011

1,2-di-*p*-tolylselenane

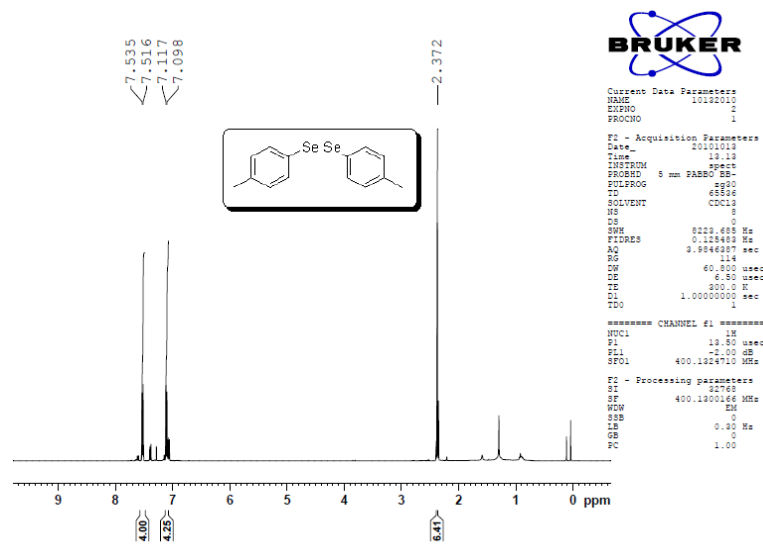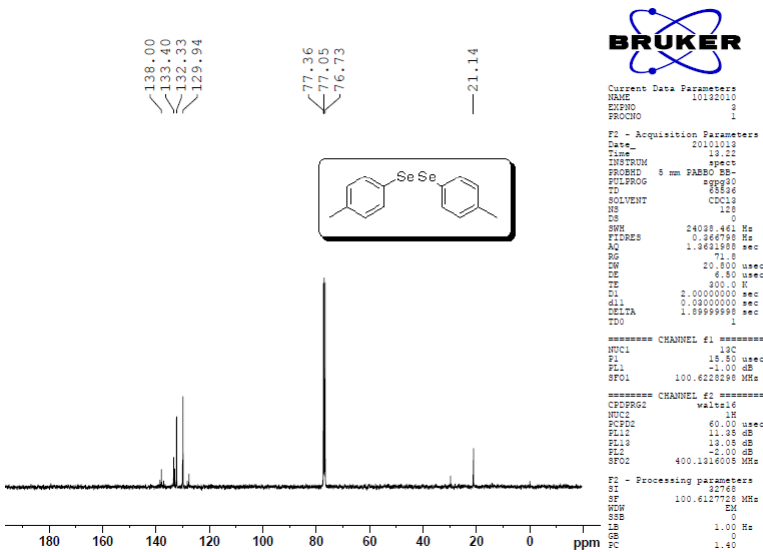

Supplementary Material (ESI) for Organic & Biomolecular Chemistry  
This journal is (c) The Royal Society of Chemistry 2011

1,2-bis(4-chlorophenyl)diselane

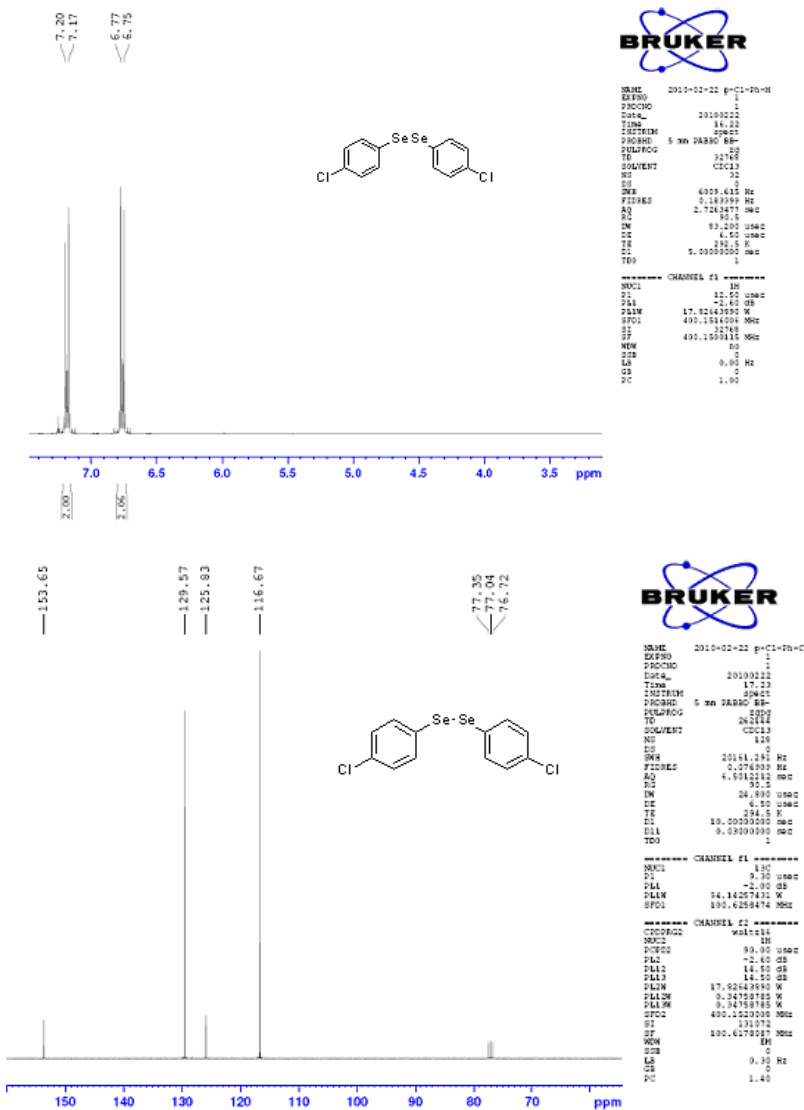



Supplementary Material (ESI) for Organic & Biomolecular Chemistry  
This journal is (c) The Royal Society of Chemistry 2011

1,2-bis(4-nitrophenyl)diselane

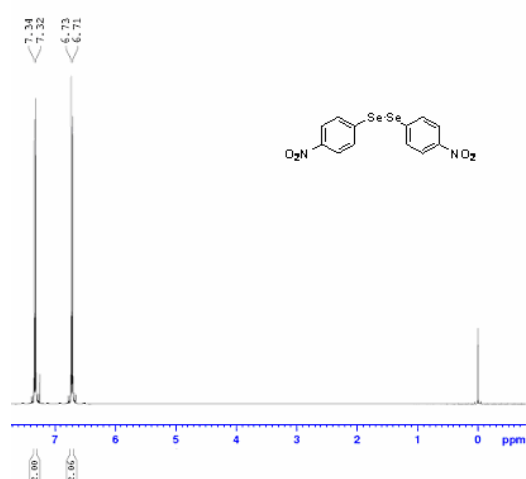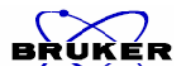

```

NAME      11172010
EXPNO     4
PROCNO    1
Date_     20101118
Time      1.09
INSTRUM    spect
PROBHD     5 mm PABBO BB-
PULPROG    zgpg
TD          65536
SOLVENT    CDCl3
NS          16
DS          0
SWH         8219.685 Hz
FIDRES      0.125493 Hz
AQ          3.9546007 sec
RG          114
DW          60.800 nsec
DE          0.00 nsec
TE          298.2 K
D1          1.00000000 sec
TD0         1

===== CHANNEL f1 =====
NUC1       1H
P1         12.50 nsec
PL1        -2.00 dB
SFO1       400.1424710 MHz
SI         32768
SF         400.1400155 MHz
WDW        EM
SSB         0
LB          0.30 Hz
GB          0
PC          1.00
    
```

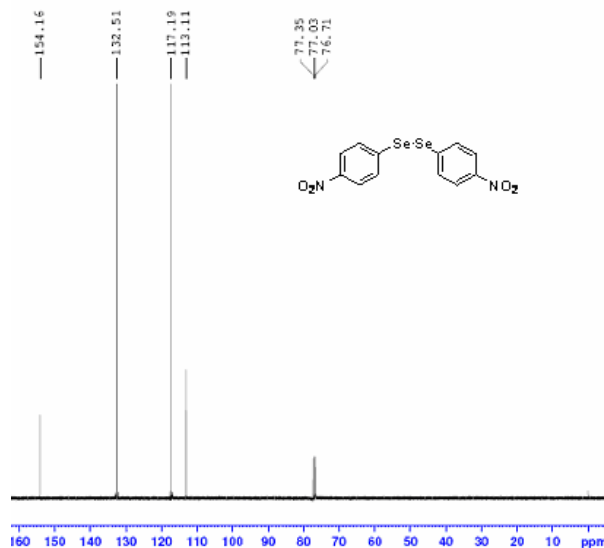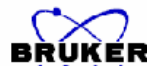

```

NAME      11172010
EXPNO     1
PROCNO    1
Date_     20101026
Time      10.08
INSTRUM    spect
PROBHD     5 mm PABBO BB-
PULPROG    zgpg
TD          65536
SOLVENT    CDCl3
NS          0
DS          0
SWH         8229.300 Hz
FIDRES      0.125493 Hz
AQ          3.5946307 sec
RG          13.5
DW          60.800 nsec
DE          0.00 nsec
TE          298.1 K
D1          1.00000000 sec
TD0         1

===== CHANNEL f1 =====
NUC1       13C
P1         12.50 nsec
PL1        -2.00 dB
SFO1       400.1424710 MHz
SI         32768
SF         400.1400155 MHz
WDW        EM
SSB         0
LB          0.30 Hz
GB          0
PC          1.00
    
```

Supplementary Material (ESI) for Organic & Biomolecular Chemistry  
This journal is (c) The Royal Society of Chemistry 2011

1,2-bis(4-fluorophenyl)diselane

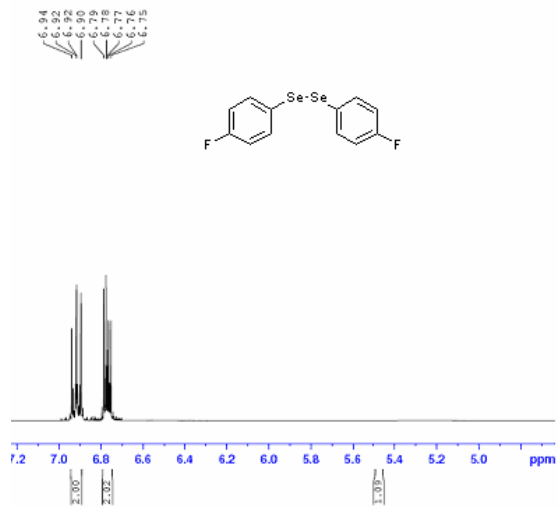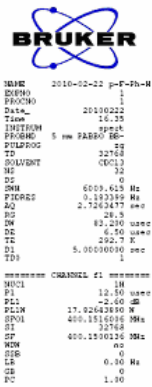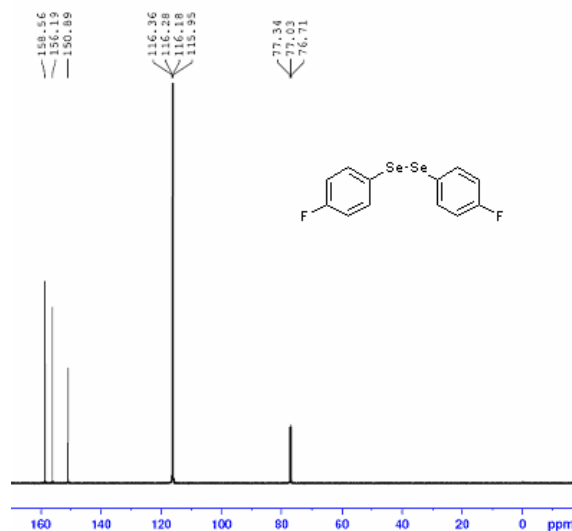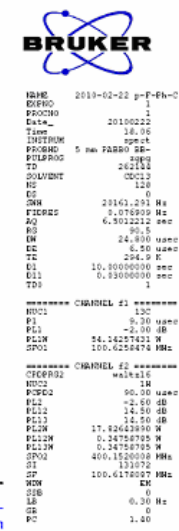

7.705  
7.686  
7.680  
7.539

— 2.009

MeOC COc1ccc(cc1)[Se][Se]c2ccc(cc2)C(=O)OC COMe

NAME 14102010-0005  
EXPNO 15  
PROCNO 1  
DATE\_ 20101015  
TIME 2.51  
INSTRUM spect  
PROBHD 5 mm BBOBO 50-  
PULPROG zgpg30  
TD 42512  
F2 42512  
SOLVENT CDCl3  
NS 2  
DS 0  
SWH 8003.495 Hz  
FIDRES 0.125493 Hz  
AQ 3.9848197 sec  
RG 114  
DW 60.800 usec  
DE 0.50 usec  
TE 296.4 K  
FL 1.00000000 sec  
TDO

===== CHANNEL F1 =====  
NUC1 1H  
P1 12.50 usec  
PL1 -2.00 dB  
SFO1 400.1324710 MHz  
ZG 32760  
SF 400.1300000 MHz  
GTM CW  
GB 0  
TR -0.20 Hz  
GB 0.2  
PC 1.00

4.04  
4.02

6.00

ppm

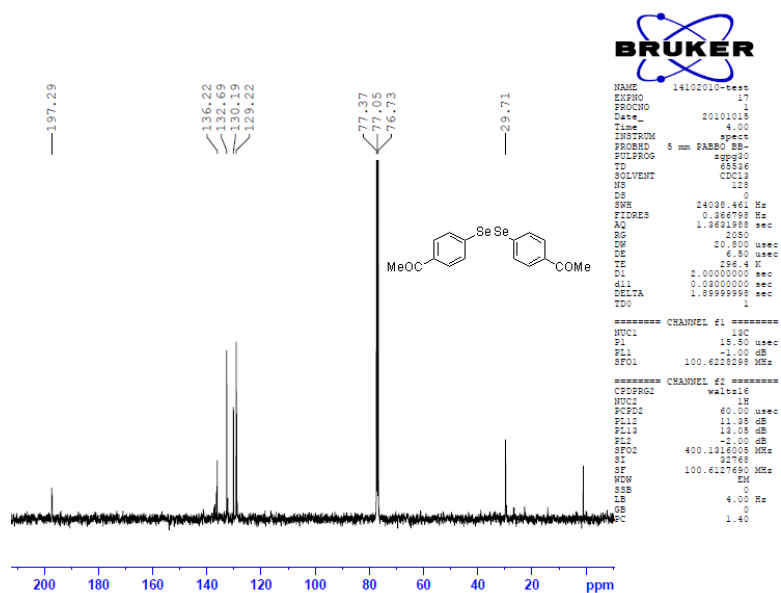

Supplementary Material (ESI) for Organic & Biomolecular Chemistry  
This journal is (c) The Royal Society of Chemistry 2011

1,2-bis(4-methoxyphenyl)disilane

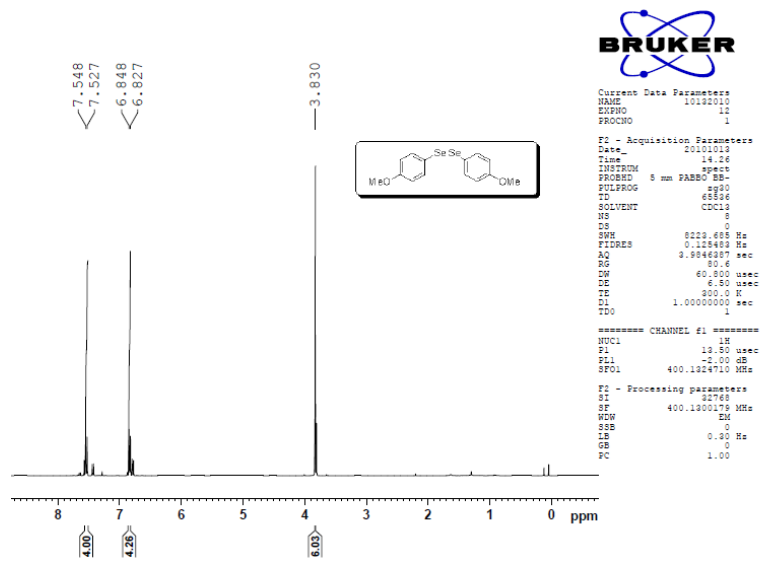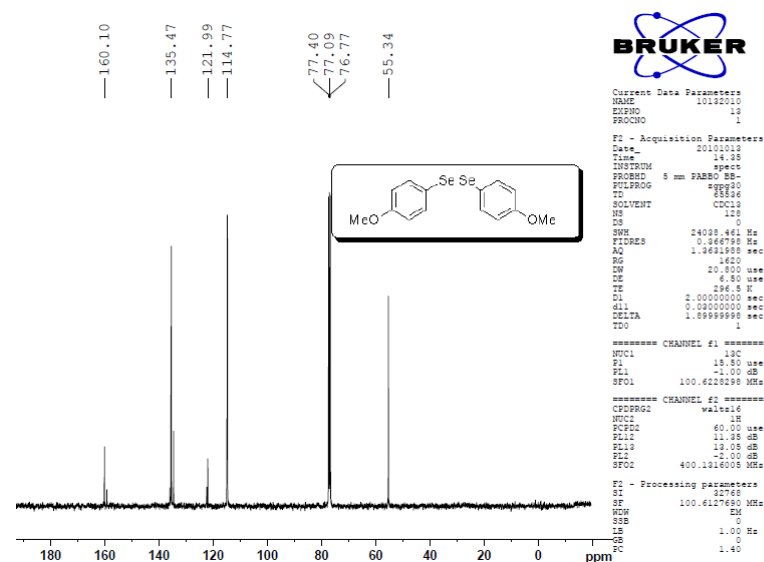

Supplementary Material (ESI) for Organic & Biomolecular Chemistry  
This journal is (c) The Royal Society of Chemistry 2011

1,2-bis(3-methoxyphenyl)disilane

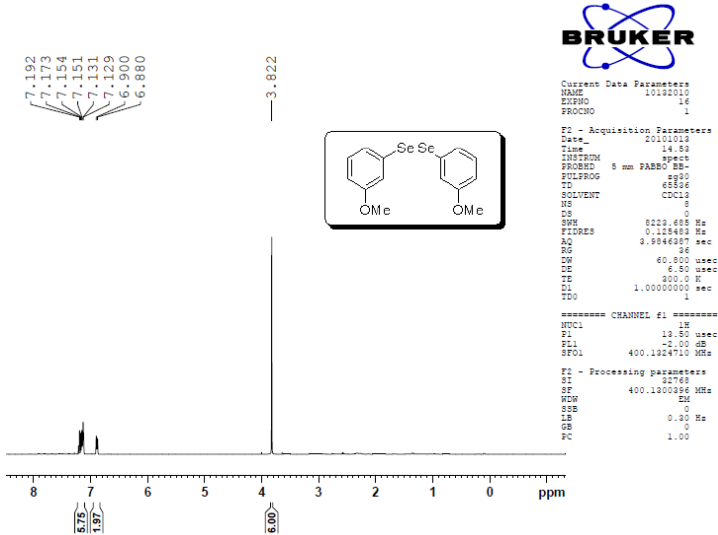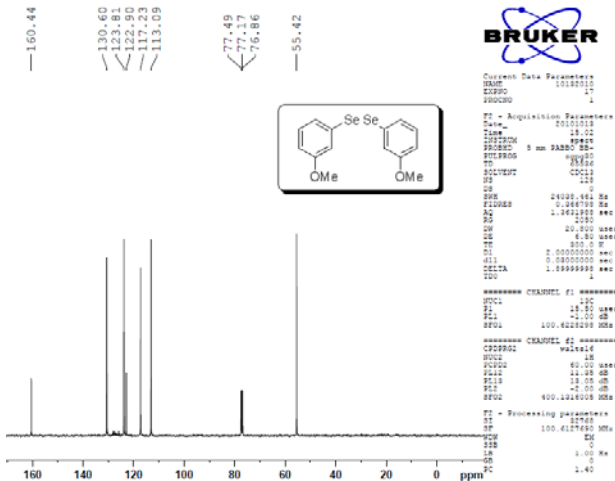

Supplementary Material (ESI) for Organic & Biomolecular Chemistry  
This journal is (c) The Royal Society of Chemistry 2011

1,2-bis(2-methoxyphenyl)disilane

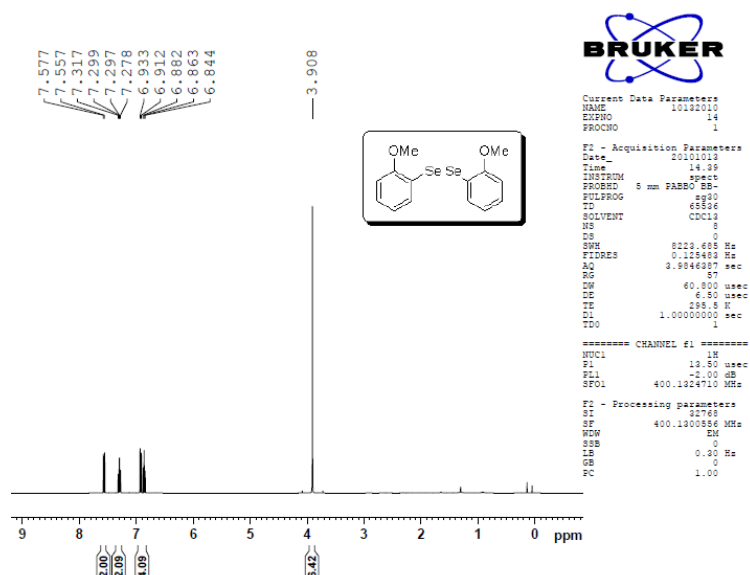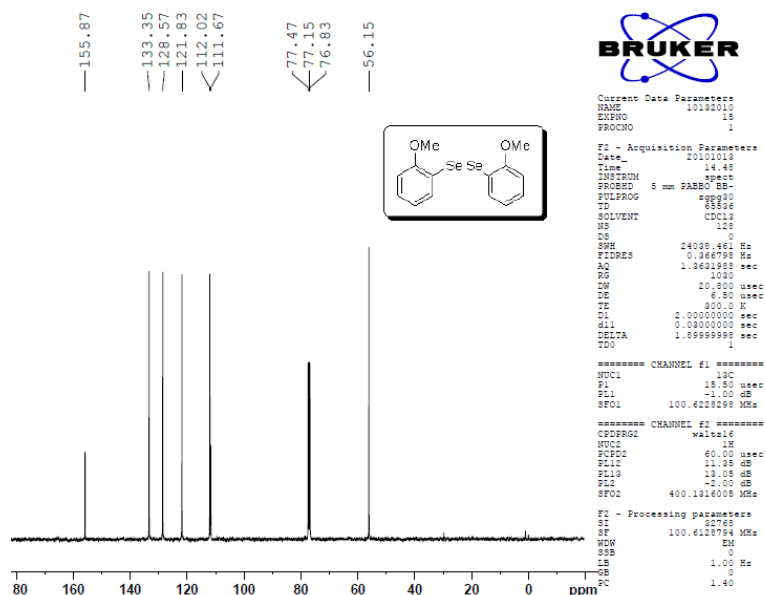

**Supplementary Material (ESI) for Organic & Biomolecular Chemistry**  
This journal is (c) The Royal Society of Chemistry 2011

**1,2-di-*o*-tolydiselane**

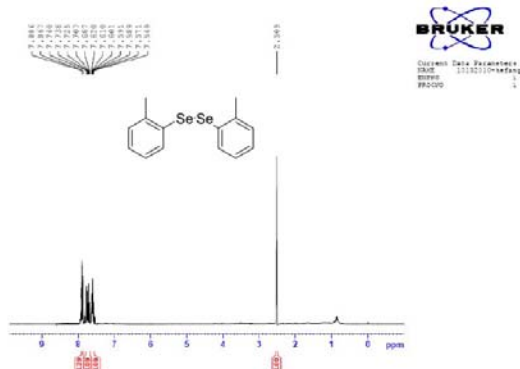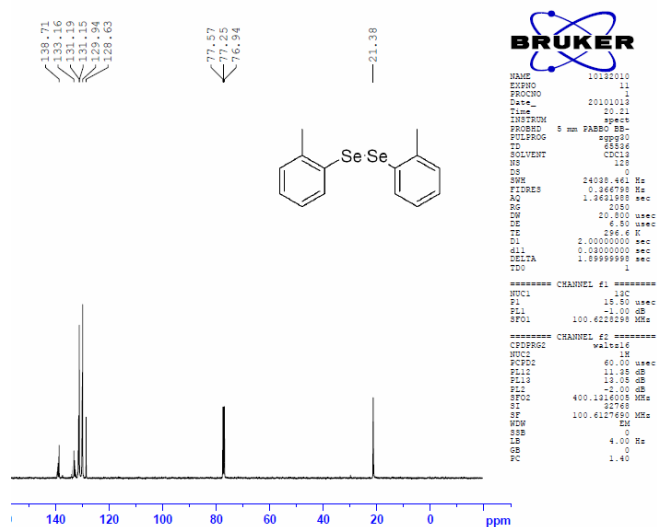

Supplementary Material (ESI) for Organic & Biomolecular Chemistry  
This journal is (c) The Royal Society of Chemistry 2011

3-(2-(pyridine-3-yl)diselanyl)pyridine

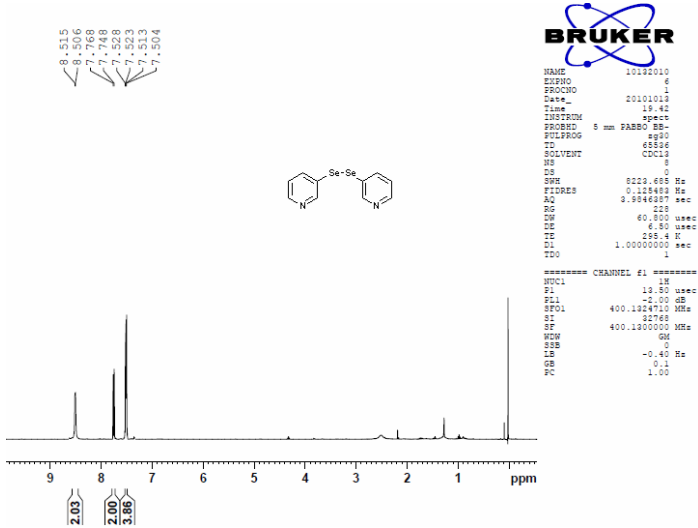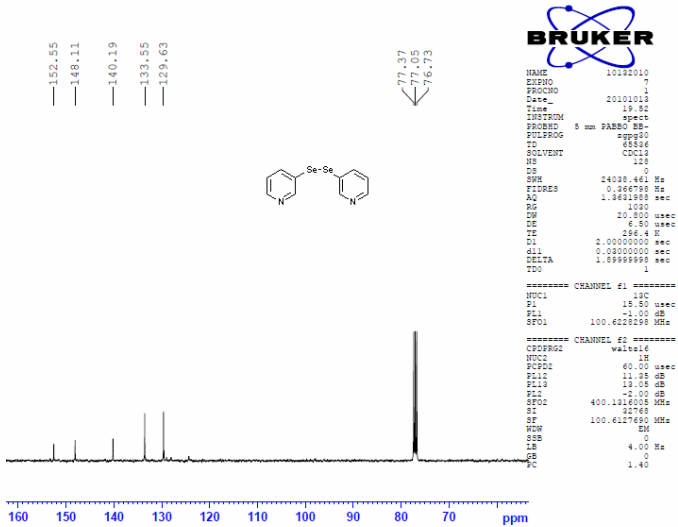



Supplementary Material (ESI) for Organic & Biomolecular Chemistry  
This journal is (c) The Royal Society of Chemistry 2011

1,2-di(naphthalen-1-yl)diselane

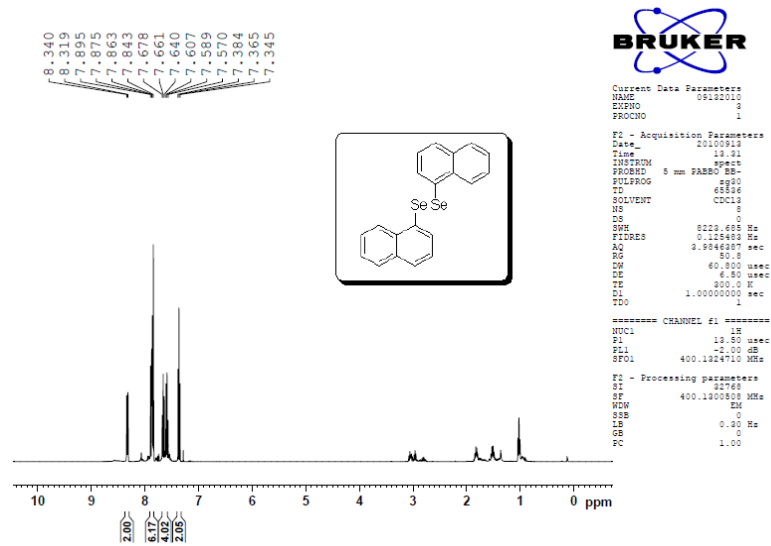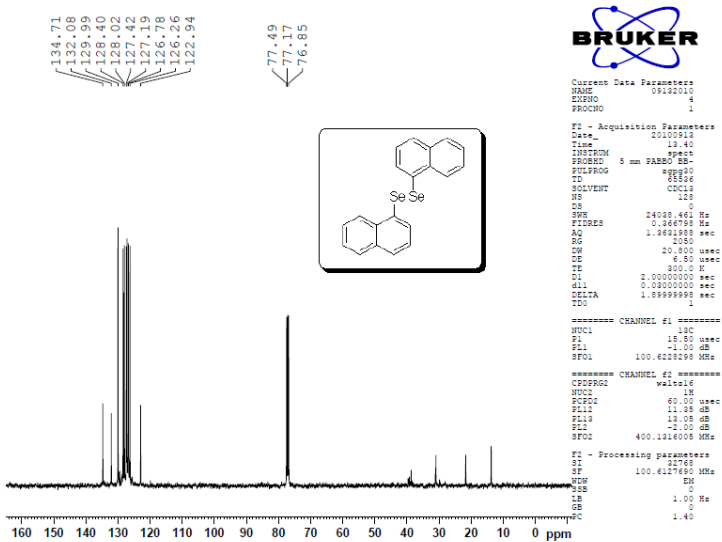

Supplement: c3ob40464a.pdf [file c3ob40464a.pdf]
